# Supplementary material
Source: publisher figshare collection journal article supplement (https://acs.figshare.com/ndownloader/files/13383740)
Supplement: Supplementary file 1 [file 13383740]

## Supporting Information

### **Highly Efficient and Environmentally Stable Flexible Color Converters based on Confined $\text{CH}_3\text{NH}_3\text{PbBr}_3$ Nanocrystals**

*Andrea Rubino, Miguel Anaya, Juan Galisteo-López, T. Cristina Rojas Ruiz, Mauricio E. Calvo\* and Hernán Míguez\**

Institute of Materials Science of Seville, Spanish National Research Council-University of Seville, C/Américo Vespucio 49, 41092, Seville, Spain.

\*E-mail: mauricio.calvo@icmse.csic.es; h.miguez@csic.es

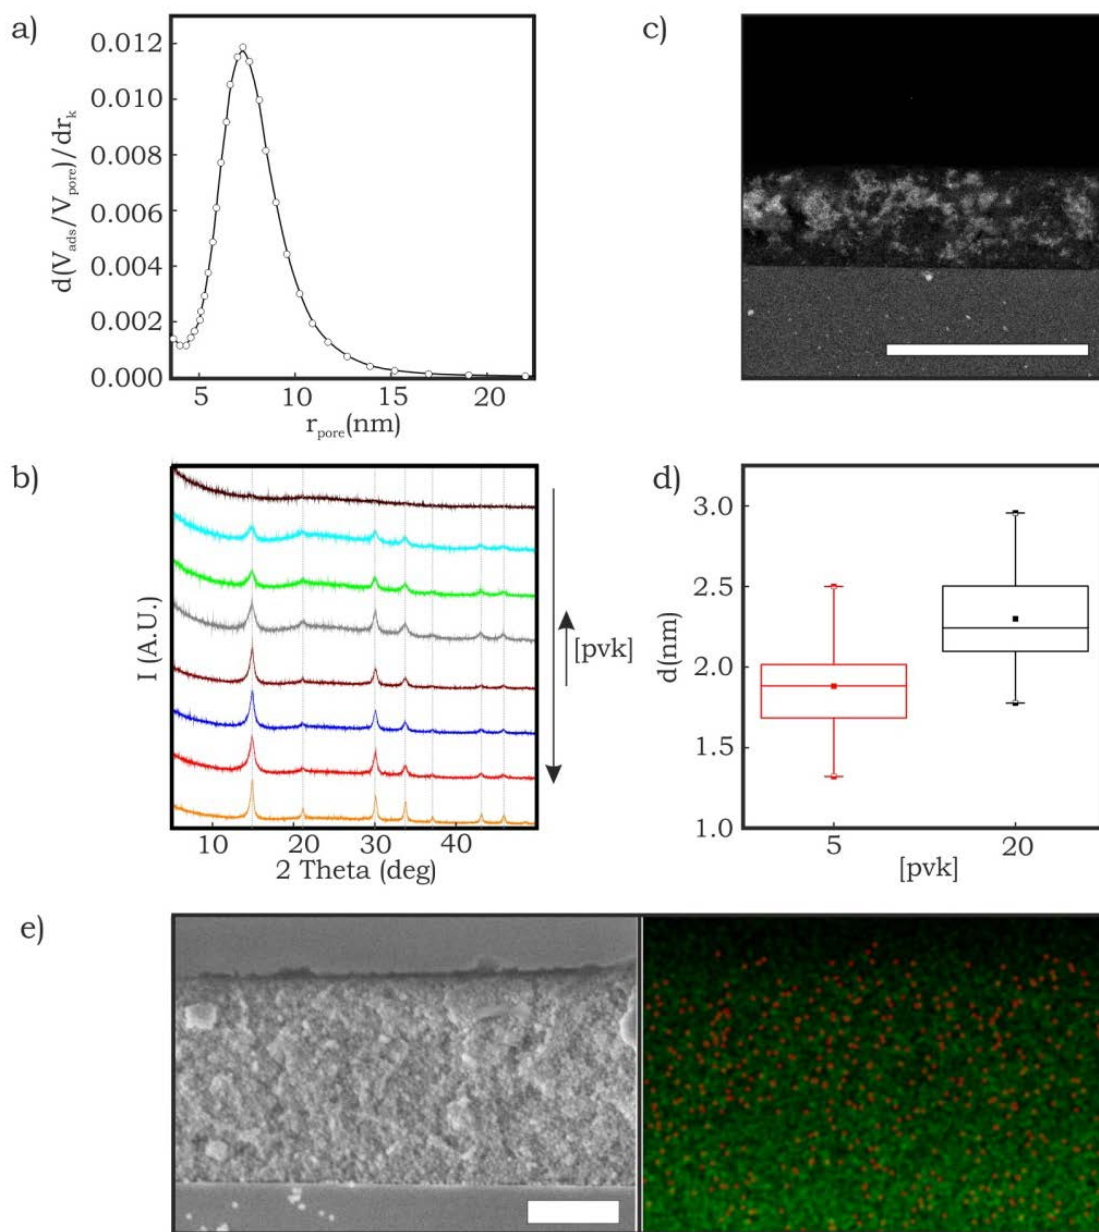

Figure S1. a) Pore size distribution inside silica nanoparticles matrices. b) XRD pattern of the different MAPbBr<sub>3</sub> nanocrystals encapsulated in the SiO<sub>2</sub> mesoporous scaffold and prepared with different precursor concentration. Gray lines indicate the reference peaks of bulk MAPbBr<sub>3</sub> macrocrystals. c) SEM backscattered electron image of a cross section of a SiO<sub>2</sub> nanoparticle mesoporous film including MAPbBr<sub>3</sub> nanocrystals prepared from a solution with a 5 wt.% of precursors. Scale bar is 2  $\mu\text{m}$ . d) Box chart representation of the size distribution of perovskite nanocrystals corresponding to the synthesis with a 5 wt.% and 20 wt.% concentrated solutions of precursors. e) Left image: SEM micrograph of a cross section of MAPbBr<sub>3</sub>@SiO<sub>2</sub> sample, identical to the one in figure S1c. Right image: EDX chemical mapping for lead (red spots) and silicon (green spots). Scale bar is 500 nm.

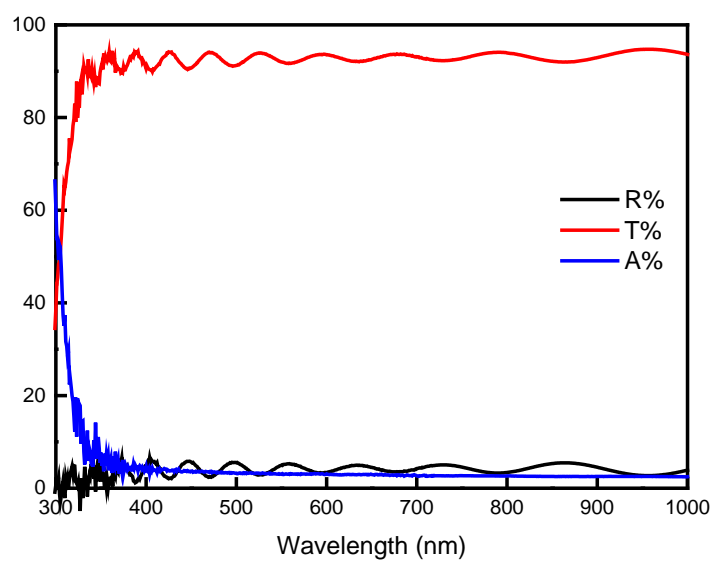

Figure S2. UV-Vis reflectance, transmittance and absorptance (black, red and blue curves, respectively) of a silica NPs layer deposited on glass substrate.

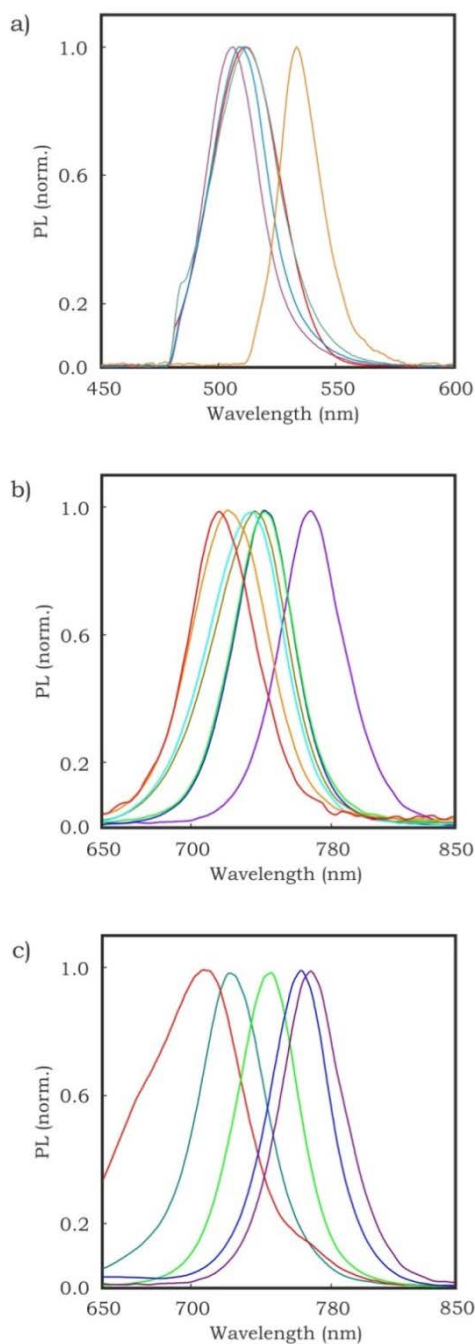

Figure S3. a) Normalized PL spectra of MAPbBr<sub>3</sub> nanocrystals from a 20% concentrated solution infiltrated in mesoporous film built up with nanoparticles of TiO<sub>2</sub> (green line), SnO<sub>2</sub> (red line), SiO<sub>2</sub> with a diameter of 30 nm (blue line) and SiO<sub>2</sub> with a diameter of 10 nm (violet line). The orange line corresponds to the emission of a bulk bromide perovskite film. b) Normalized PL spectra of MAPbI<sub>3</sub> nanocrystals infiltrated in silica nanoparticles (diameter of 30 nm) scaffold and prepared by varying the concentration of precursors solutions (MAI + PbI<sub>2</sub>): 5 wt.% (red line), 10 wt.% (orange line), 15 wt.% (pale blue line), 20 wt.% (dark yellow line), 25 wt.% (green line), 30 wt.% (blue line). The violet curve corresponds to the bulk material. c) Normalized PL spectra of MAPbI<sub>3</sub> nanocrystals from a 20 wt.% concentrated solution infiltrated in mesoporous film built up with nanoparticles of TiO<sub>2</sub> (red line), SnO<sub>2</sub> (blue line), SiO<sub>2</sub> with a diameter of 30 nm (green line) and SiO<sub>2</sub> with a diameter of 10 nm (green-cyan line). The violet line corresponds to the emission of a bulk iodide perovskite film.

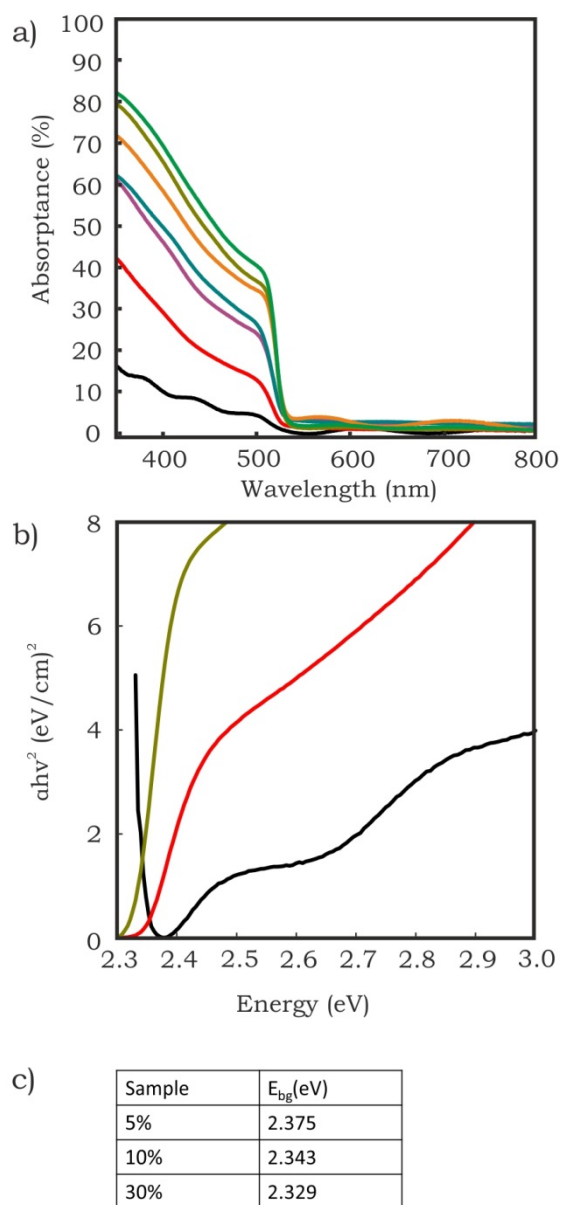

Figure S4. a) Absorbance spectra from the perovskite-silica systems prepared using a 5wt.% (black line) 10wt.% (red line) 15wt.% (violet line) 20wt.% (blue line) 25wt.% (orange line) 30wt.% (dark yellow line) 35wt.% (green line) b) Tauc plots of the films prepared with perovskites precursor solutions with a concentration of 5wt.%, 10wt.% and 30wt.% (same color line used in a)). c) Band gap energy values extracted from the intersection of the tangent to the curves represented in the Tauc plot with the x axis.

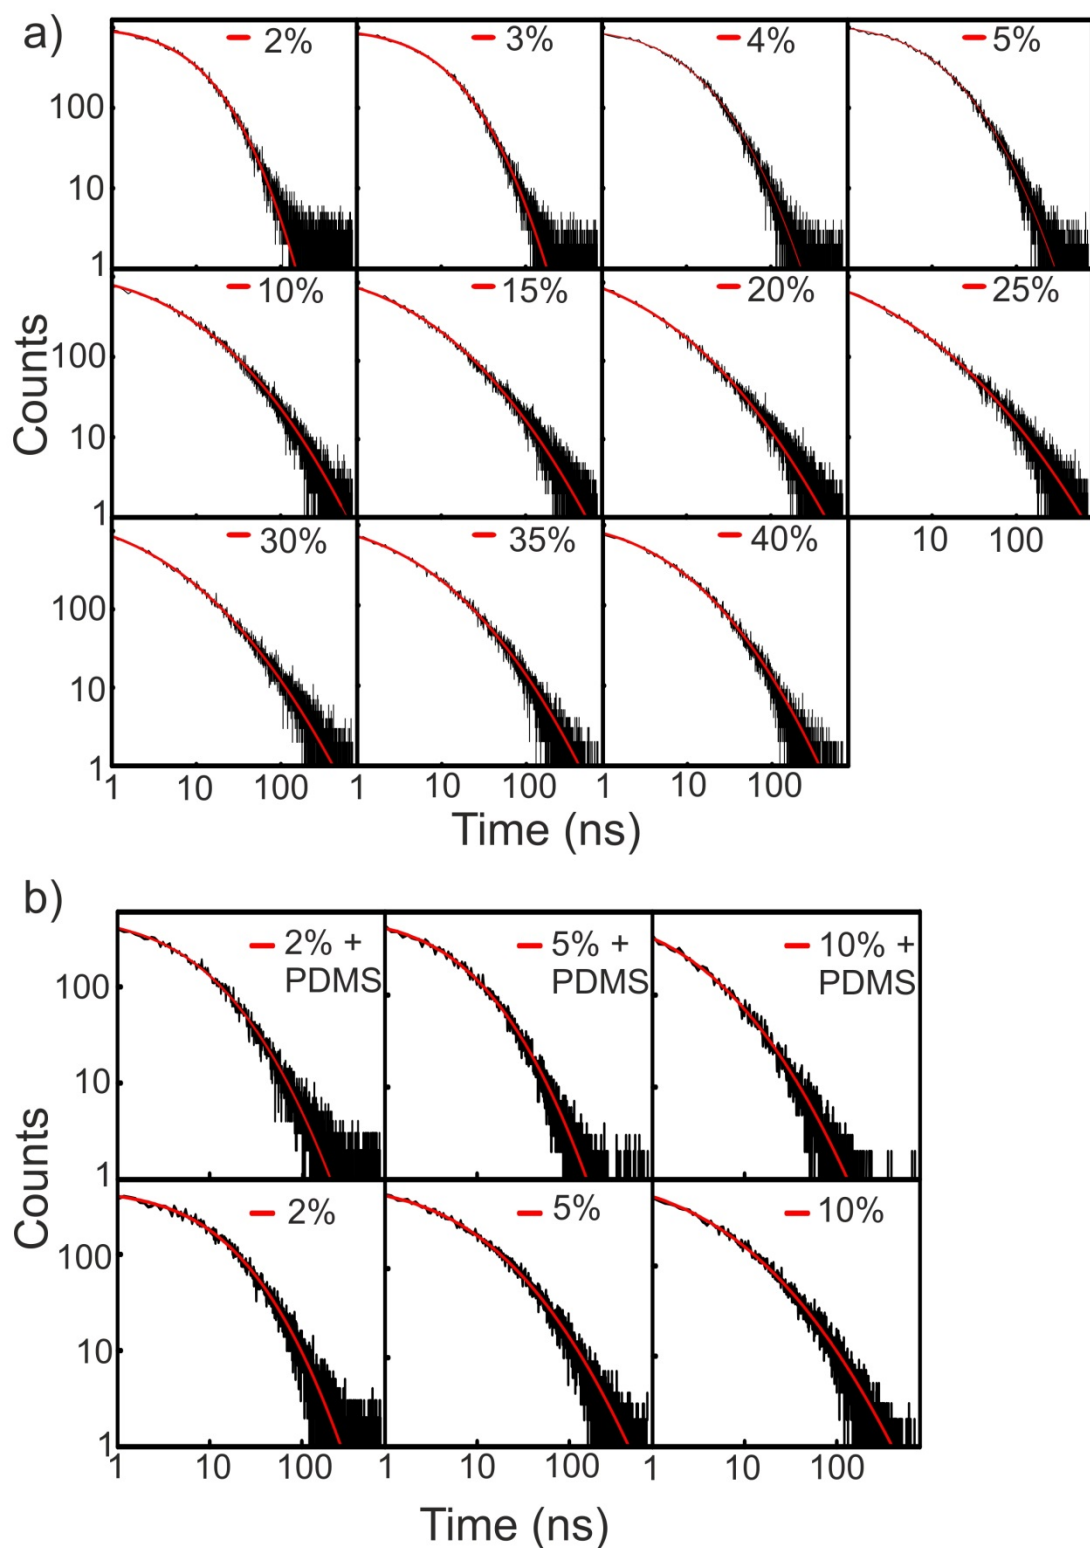

Figure S5. a) Log-log plot of the PL intensity decay curve fittings (red solid line) with the relative raw data (black solid line) for encapsulated MAPbBr<sub>3</sub> nanocrystals obtained from different precursor concentration (from 2% to 40%). b) Log-log plot of the PL intensity decay curve fittings (red solid line) with the relative raw data (black solid line) corresponding to the curves plotted in figure 4a.
